# Supplementary material for: Using Stable Sulfur Isotope to Trace Sulfur Oxidation Pathways during the Winter of 2017–2019 in Tianjin, North China
Source: MDPI journal article supplement (doi:10.3390/ijerph191710966), 2022-09-02
Supplement: s1 [file s1]

## Supplemental material

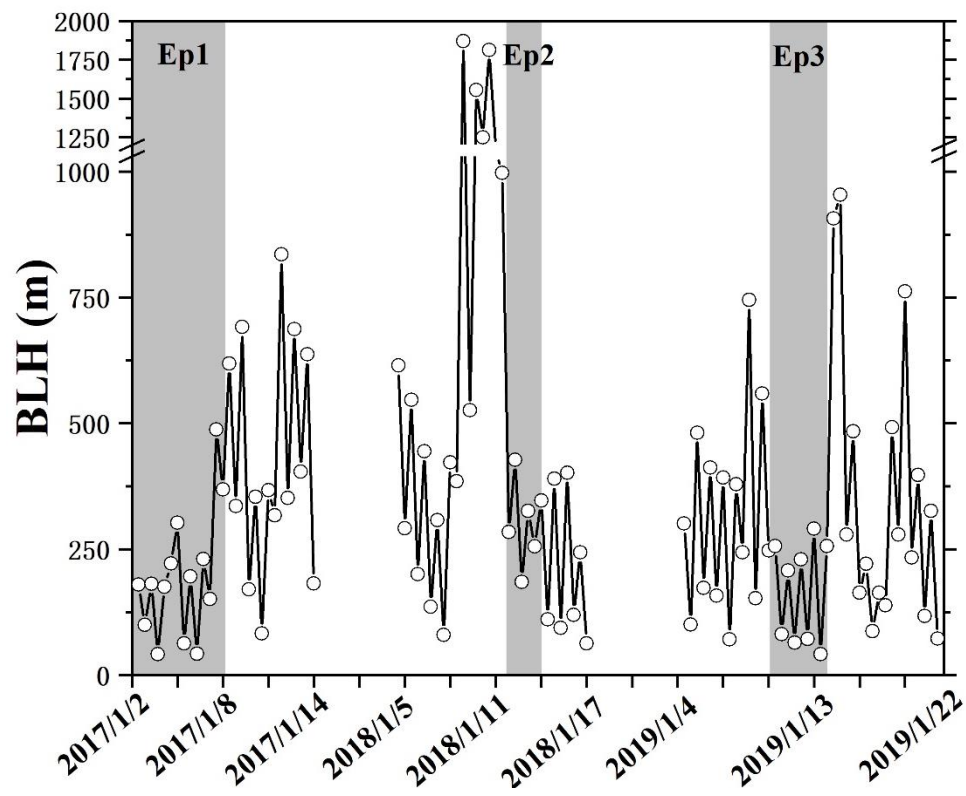

**Figure. S1.** Time series of BLH during January 2017, 2018 and 2019.

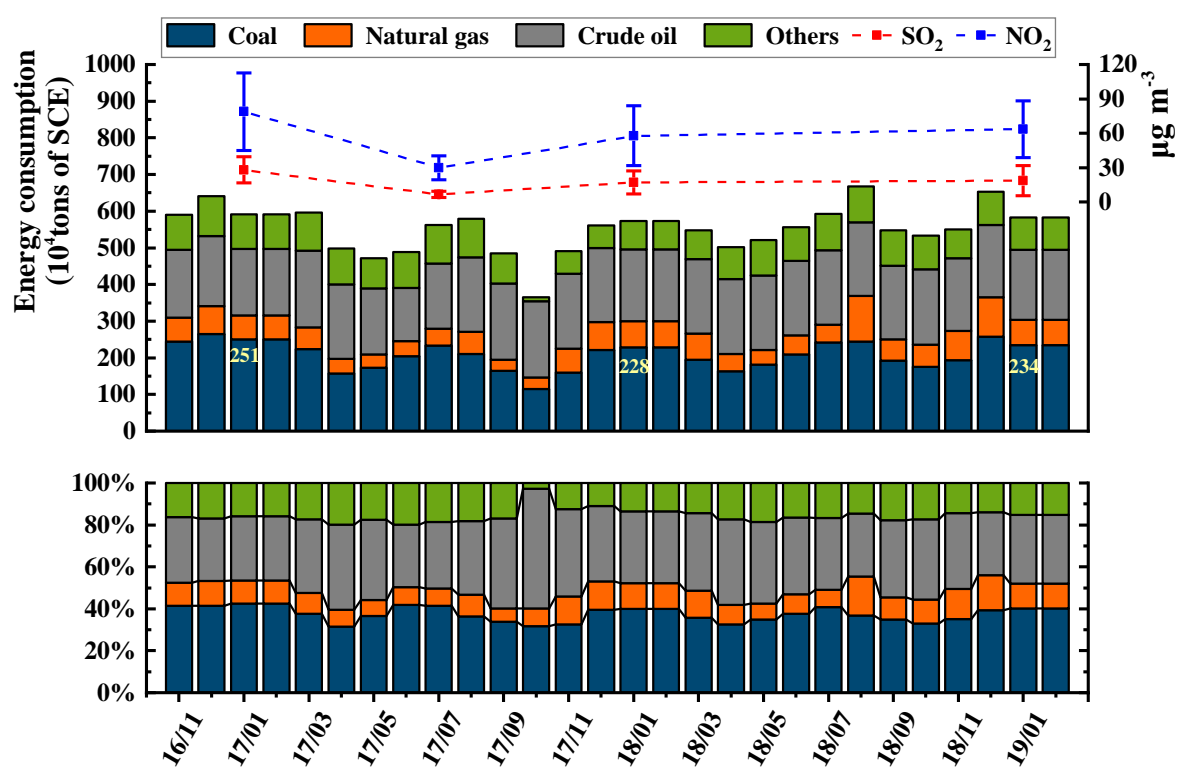

**Figure. S2.** Consumption of electricity and industrial energy above scale, including coal, natural gas, crude oil, and others (coke, oil product, and thermal) in Tianjin from Jan-2016 to Jan-2019. Data from Tianjin Municipal People's Government. Values for January and February each year are average consumption estimated by the sum of them. The SO<sub>2</sub> and NO<sub>2</sub> data during the sampling period come from the Air Quality Monitoring Station.

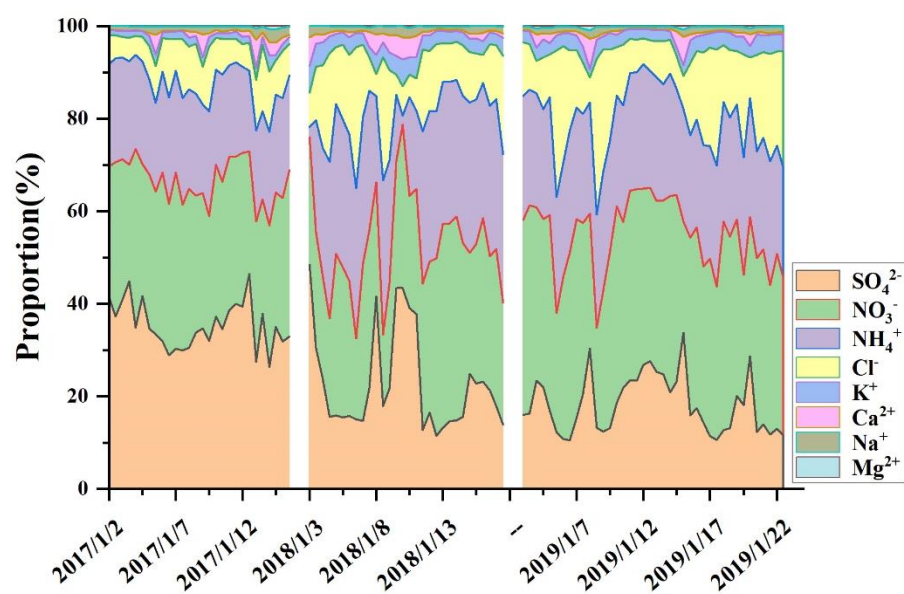

**Figure. S3.** Proportion of water-soluble ions in PM<sub>2.5</sub> during sampling period.

**Table.S1.** Features of sampling phases

| <b>Abbreviation</b> | <b>Period</b> | <b>Season</b> | <b>CRP</b>    |
|---------------------|---------------|---------------|---------------|
| Jan-2017            | 1/2~1/15/2017 | winter        | before        |
| Jan-2018            | 1/3~1/17/2018 | winter        | 1 year later  |
| Jan-2019            | 1/3~1/22/2019 | winter        | 2 years later |

**Table S2.** The concentration of PM<sub>2.5</sub>, SO<sub>2</sub>, SO<sub>4</sub><sup>2-</sup> (μg/m<sup>3</sup>), and δ<sup>34</sup>S<sub>sulfate</sub> values of air mass from different clusters.

|         | Cluster | PM <sub>2.5</sub> | SO <sub>2</sub> | SO <sub>4</sub> <sup>2-</sup> | δ <sup>34</sup> S <sub>sulfate</sub> |
|---------|---------|-------------------|-----------------|-------------------------------|--------------------------------------|
| 2017/01 | 1       | 157.4             | 29.7            | 24.9                          | 4.9                                  |
|         | 2       | 215.9             | 32.5            | 42.5                          | 5.2                                  |
|         | 3       | 146.5             | 33.0            | 19.8                          | 7.4                                  |
|         | 4       | 55.5              | 12.8            | 4.1                           | 4.7                                  |
|         | 5       | 73.5              | 21.5            | 4.9                           | 6.3                                  |
| 2018/01 | 1       | 30.5              | 12.6            | 2.7                           | 6.1                                  |
|         | 2       | 77.7              | 21.8            | 6.5                           | 5.3                                  |
|         | 3       | 23.7              | 6.7             | 1.7                           | 6.1                                  |
|         | 4       | 125.9             | 26.0            | 9.9                           | 5.2                                  |
| 2019/01 | 1       | 72.2              | 22.1            | 5.8                           | 4.7                                  |
|         | 2       | 43.5              | 14.9            | 2.8                           | 4.8                                  |
|         | 3       | 114.2             | 22.9            | 12.7                          | 3.2                                  |
|         | 4       | 18.8              | 8.4             | 1.3                           | 6.1                                  |

**Table S3.** The contribution and uncertainties of different oxidation pathway

|                                               | Ep1                |     | Ep2                |      | Ep3                |     |
|-----------------------------------------------|--------------------|-----|--------------------|------|--------------------|-----|
|                                               | f <sub>i</sub> (%) | std | f <sub>i</sub> (%) | std  | f <sub>i</sub> (%) | std |
| OH                                            | 25.9               | 0.2 | 5.3                | 0.05 | 18.0               | 0.1 |
| H <sub>2</sub> O <sub>2</sub> /O <sub>3</sub> | 21.2               | 0.1 | 4.2                | 0.04 | 17.2               | 0.1 |
| TMI                                           | 24.7               | 0.1 | 72.6               | 0.1  | 32.3               | 0.1 |
| NO <sub>2</sub>                               | 28.2               | 0.2 | 17.9               | 0.1  | 32.5               | 0.2 |
